# Supplementary material
Source: publisher figshare collection journal article supplement (https://karger.figshare.com/ndownloader/files/24193028)
Supplement: Supplementary file 1 [file 24193028]

**Supplementary Table S2.** Overview of systemically reacting patients during VIT induction phase.

| Patient | Sex | Age | Protocol  (VIT day, single and cumulative dose*) | Symptoms | Objective symptoms | Grade** | Required allergy medication |
| --- | --- | --- | --- | --- | --- | --- | --- |
| 1 | Female | 40 | Honeybee cluster  (day 22, 50 µg, cum. 205 µg) | Palmar paraesthesia and pruritus | No | I | i.v. antihistamine and corticosteroid |
| 2 | Male | 58 | Honeybee cluster  (day 1, 20 µg, cum. 35 µg) | Palmar paraesthesia, flush (face, neck, arms and décolleté) | Yes | I | i.v. antihistamine and corticosteroid |
| 3 | Male | 51 | Honeybee cluster  (day 8, 30 µg, cum. 115µg) | Paraesthesia (lips) | No | I | No |
| 4 | Male | 54 | Wasp cluster  (day 1, 5 µg, cum. 5 µg) | Disseminated pruritus, flush (arms, décolleté) | Yes | I | Oral antihistamine |
| 5 | Female | 72 | Honeybee rush  (day 2, 60 µg, cum. 136,11 µg) | Genital paraesthesia and pruritus | No | I | No |
| 6 | Female | 43 | Honeybee rush  (day 1, 5 µg, cum. 6.11 µg) | Severe nausea, headache | No | II | No |
| 7 | Female | 31 | Honeybee ultra-rush  (day 1, 20 µg, cum. 31.1 µg) | Flush (face, arms and décolleté), abdominal cramps, tachycardia | Yes | II | i.v. antihistamine and corticosteroid |
| 8 | Male | 45 | Honeybee ultra-rush  (day 1, 20 µg, cum. 31.1 µg) | Flush (face, décolleté), plantar paraesthesia, cough/dyspnoea | Yes | II | i.v. and oral antihistamine, salbutamol inhalation |
| 9 | Male | 20 | Honeybee ultra-rush  (day 1, 20 µg, cum. 31.1 µg) | Flush (face, neck and décolleté), pruritus (scalp, palmar and lips) | Yes | I | Oral antihistamine and corticosteroid |
| 10 | Female | 55 | Wasp ultra-rush  (day 1, 50 µg, cum. 111.1 µg) | Flush (face, upper back and décolleté) | Yes | I | Oral antihistamine and corticosteroid |
| 11 | Male | 29 | Wasp ultra-rush  (day 1, 50 µg, cum. 111.1 µg) | Flush, vertigo | Yes | I | Oral antihistamine and corticosteroid |

** day of VIT, single and cumulative dose at which SR occurred, ** according Ring and Messmer classification; cum., cumulative; VIT, venom immunotherapy.*
